# Supplementary material
Source: PubMed Central journal article supplement (PMC3876957)

# Measurement of Electron Transfer through Cytochrome P450 Protein on Nanopillars and the Effect of Bound Substrates

## Supporting Information

John E. Jett,<sup>1</sup> David Lederman,<sup>2</sup> Lance A. Wollenberg,<sup>1</sup> Debin Li,<sup>2</sup> Darcy R. Flora,<sup>3</sup> Christopher Bostick,<sup>1</sup> Timothy S. Tracy,<sup>4</sup> and Peter M. Gannett<sup>1\*</sup>

<sup>1</sup>West Virginia University, Basic Pharmaceutical Sciences, Morgantown, WV 26506-9530, <sup>2</sup>West Virginia University, Department of Physics, Morgantown, WV 26506-6315, <sup>3</sup>University of Minnesota, College of Pharmacy, Minneapolis, MN, 55455, <sup>4</sup>University of Kentucky, College of Pharmacy, KY 40536.

### Contents

Figure S1, Mask pattern

Figure S2, Cross pattern after deposition of chromium and gold

Figure S3, SEM and AFM images of the finished nanopillars

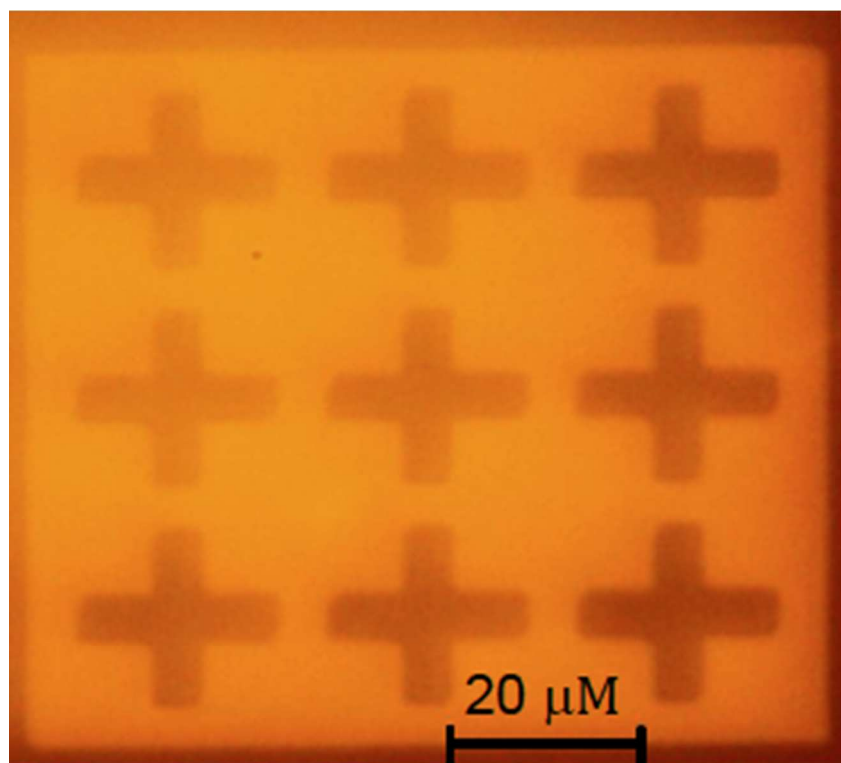

**Figure S1.** Mask Pattern. The nine crosses define four interior regions where the nanopillar arrays will be created.

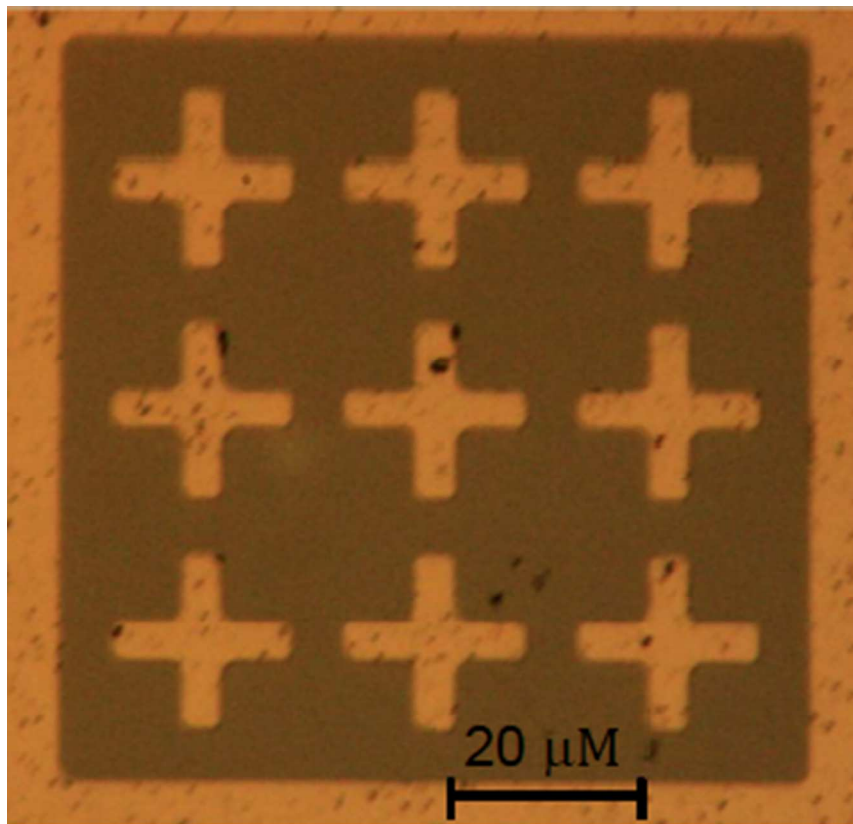

**Figure S2.** Pattern after deposition of 2 nm Cr and 10 nm Au.

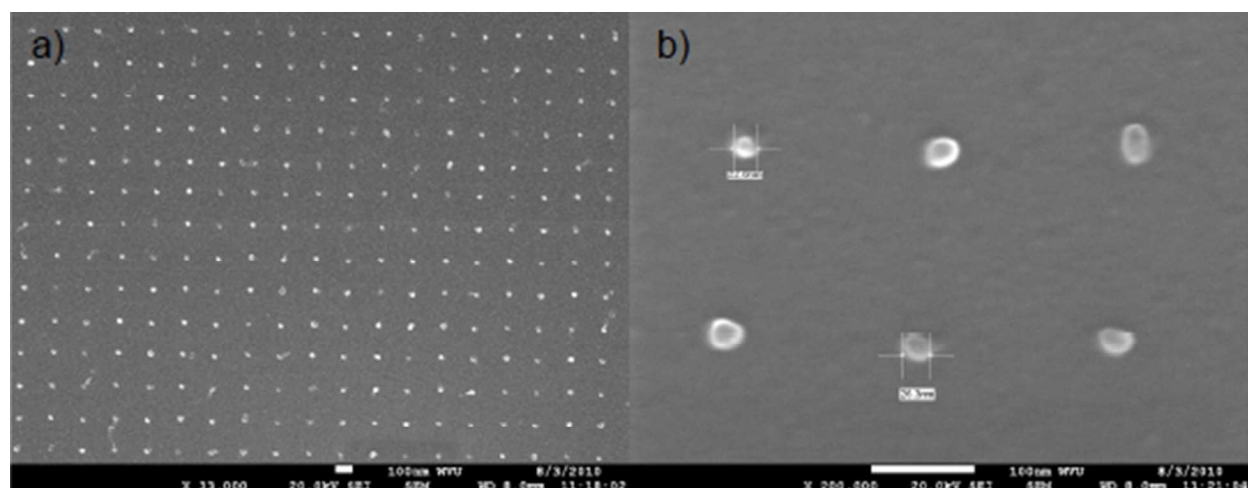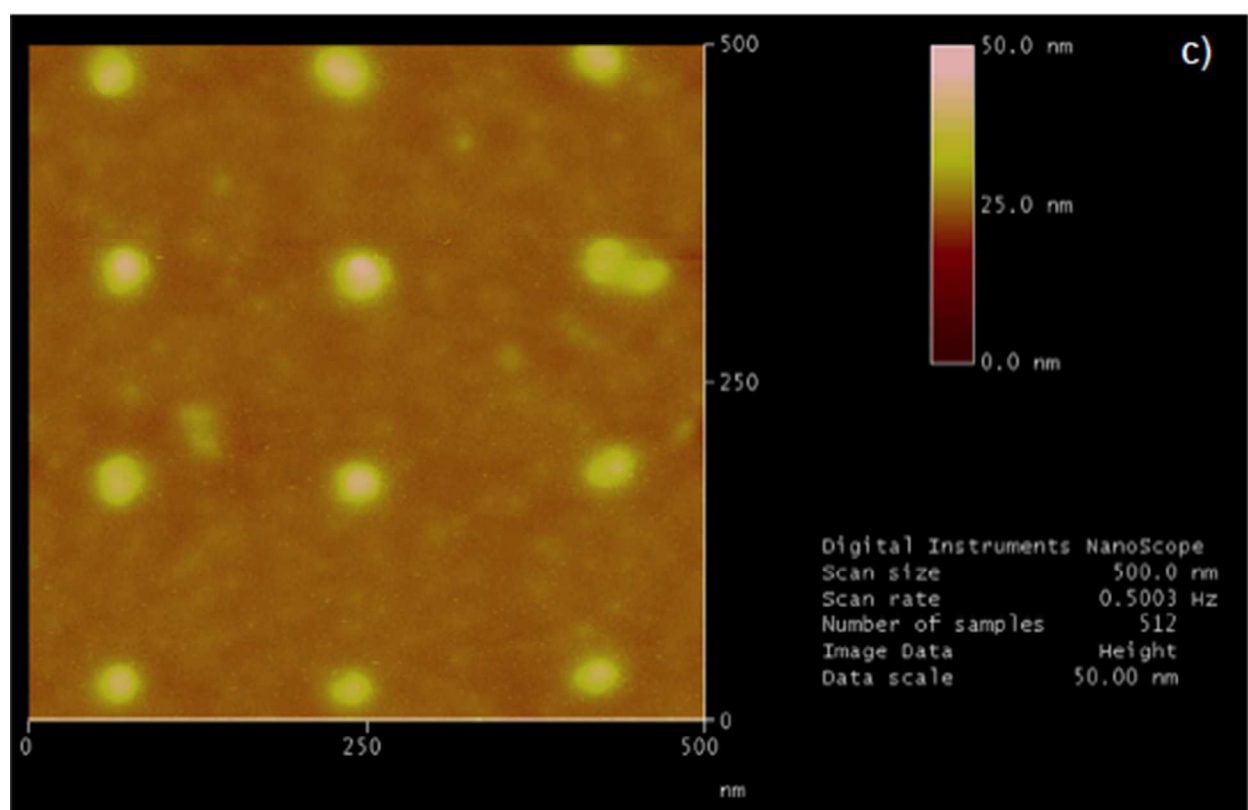

Supplement: NIHMS449848-supplement-1_si_001.pdf [file NIHMS449848-supplement-1_si_001.pdf]
